# Supplementary material
Source: PubMed Central journal article supplement (PMC2342962)
Supplement: jphysiol_2002.036897_1.pdf [file jphysiol_2002.036897_1.pdf]

## Supplementary material

### **Title: Postprandial protein metabolism during aging: raw data and calculations using KIC as a precursor**

Authors: Martial Dangin, Christelle Guillet, Clara Garcia-Rodenas, Pierre Gachon, Corinne Bouteloup-Demange, Kristel Reiffers-Magnani, Jacques Fauquant, Olivier Ballèvre and Bernard Beaufrère

DOI: 10.1113/jphysiol.2002.036897

#### **Supplementary material**

The online version of this paper can be found at:

<http://www.jphysiol.org/cgi/content/full/XXX/X/XXX>

and contains material entitled:

Postprandial protein metabolism during aging: raw data and calculations using KIC as a precursor.

Contents: 1 PDF file.

### **Electronic journal archives (part 1: results)**

**Tracer enrichments:** In all studies, plasma [ $^{13}\text{C}$ ] leucine MPE (*i.v.* tracer) reached a plateau before meal ingestion with no significant effect of age and of the type of meal (Fig. 6A, Tab. 2, electronic journal archive). Thereafter, those enrichments decreased differently among meals ( $Y_{\max}$ :  $P < 0.01$ ,  $T_{1/2}$ :  $P < 0.001$ , AUC:  $P < 0.05$ ) with no effect of age. In both age groups, the maximal variations induced by WP-iN were more pronounced ( $Y_{\max}$ :  $P < 0.001$ ), but with a lower AUC ( $P < 0.05$ ) and a longer  $T_{1/2}$  than with CAS ( $P < 0.001$ ). In young men, comparison between WP-iL and CAS led to the same conclusions. By contrast, in the older group only  $T_{1/2}$  was longer (WP-iL vs. CAS:  $P < 0.001$ ). The oral tracer ([ $^2\text{H}_3$ ] leucine MPE, Fig. 6B, Tab. 2, electronic journal archive) appeared rapidly in the plasma, with differences related to the meals ingested ( $P < 0.01$ ). With similar dietary protein enrichment, WP-iL had faster absorption than CAS in both age groups ( $T_{1/2}$ ,  $P < 0.01$ ), a higher peak ( $P < 0.01$ ) and a lower AUC ( $P < 0.01$ ). With WP-iN (lower dietary protein enrichment),  $Y_{\max}$  and AUC were lower ( $P < 0.001$ ) but  $T_{1/2}$  ( $P < 0.05$ ) was again shorter than with CAS. There was an effect of age since the differences between the WP meals and CAS (WP-iL minus CAS and WP-iN minus CAS) were smaller in the old group ( $Y_{\max}$ :  $P < 0.01$ ;  $T_{1/2}$ :  $P < 0.001$ ) than in the young one. Plasma [ $^{13}\text{C}$ ] and [ $^2\text{H}_3$ ] KIC MPE paralleled the pattern of plasma [ $^{13}\text{C}$ ] and [ $^2\text{H}_3$ ] leucine, respectively (Fig. 7A, B, electronic journal archive).

Time dependent evolutions of  $^{13}\text{CO}_2$  production rate ( $\mu\text{mol kgMM}^{-1} \text{min}^{-1}$ ) were shown in the electronic journal archive (Fig. 6C and in Tab. 2).  $^{13}\text{CO}_2$  production rate responded differently to meals. Indeed, in both age groups, WP-iL and WP-iN induced higher  $Y_{\max}$  ( $P < 0.05$ ) a, shorter  $T_{1/2}$  ( $P < 0.05$ , except WP-iN vs. CAS in the older group,  $P = \text{NS}$ ). Age affected the differences between WP meals and CAS on  $Y_{\max}$ ,  $T_{1/2}$  and AUC (Tab. 2), the differences being smaller in elderly subjects than in young men ( $P < 0.01$ ).

**Electronic journal archives (part 2: Table)**

**Table 2. Kinetics of fluxes calculated using KIC enrichment after meal ingestion.**

|             |                  | Young (n=6)  |             |              | Elderly (n=9) |             |             | Age-effect<br>Δ WP vs. CAS |
|-------------|------------------|--------------|-------------|--------------|---------------|-------------|-------------|----------------------------|
|             |                  | WP-iN        | CAS         | WP-iL        | WP-iN         | CAS         | WP-iL       |                            |
| Exo Leu Ra  | Y <sub>max</sub> | 1. 88±0. 12* | 0. 69±0.05  | 1. 36±0. 05* | 1. 37±0. 05*  | 0. 91±0. 08 | 1. 11±0. 12 | †                          |
|             | T <sub>1/2</sub> | 129±5*       | 197±6       | 108±5*       | 145±7*        | 171±9       | 141±12*     | †                          |
|             | AUC              | 342±27*      | 189±5       | 200±9        | 275±14*       | 199±7       | 197±14      |                            |
| Endo Leu Ra | Basal            | 2. 04±0. 09  | 2. 21±0. 08 | 2. 13±0. 10  | 2. 00±0. 08   | 2. 14±0. 10 | 2. 06±0. 11 |                            |
|             | Y <sub>max</sub> | 1. 66±0. 10  | 1. 74±0. 06 | 1. 75±0. 10  | 1. 48±0. 04   | 1. 53±0. 13 | 1. 61±0. 11 |                            |
|             | T <sub>1/2</sub> | 197±2        | 204±2       | 199±2        | 192±5*        | 209±2       | 200±1*      | †                          |
|             | AUC              | 777±46       | 807±27      | 811±34       | 739±23        | 768±43      | 754±45      |                            |
| NOLD        | Basal            | 1. 86±0. 08  | 1. 91±0. 06 | 1. 83±0. 06  | 1. 70±0. 08   | 1. 78±0. 08 | 1. 75±0. 09 |                            |
|             | Y <sub>max</sub> | 2. 79±0. 14* | 2. 31±0. 09 | 2. 63±0. 11  | 2. 78±0. 20*  | 2. 25±0. 09 | 2. 26±0. 09 |                            |
|             | T <sub>1/2</sub> | 181±2*       | 204±3       | 183±2*       | 184±5*        | 199±2       | 191±3       | †                          |
|             | AUC              | 772±31       | 767±25      | 740±22       | 696±31        | 705±38      | 680±28      |                            |

Meals ingested contained casein (CAS) or two different amounts of whey proteins: WP-iN isonitrogenous with CAS or WP-iL that provided the same amount of leucine as CAS.

Results are means ± S.E.M. Basal: baseline values. Y<sub>max</sub>: zenith or nadir value ; T<sub>1/2</sub>: time to reach half area under the curve (in min). AUC: postprandial area under the curve. Exo Leu Ra: Exogenous (dietary) Leucine Rate of appearance. Endo Leu Ra: Endogenous Leucine Rate of appearance, i.e. proteolysis. NOLD: Non Oxidative Leucine Disposal, i.e. protein synthesis. Leu Ox: Total Leucine Oxidized. Flux values are in μmol kgFMM<sup>-1</sup> min<sup>-1</sup> except Exo Leu Ra (μmol kg<sup>-1</sup> min<sup>-1</sup>). Statistical analyses were performed by ANOVA to assess the differences related to the type of meals within age-group (\*:P<0. 05) and to age (†:P<0. 05).

**FIGURES LEGENDS**

**Fig. 6.** Evolution of plasma leucine enrichment (panels *A* and *B*) and [<sup>13</sup>C]CO<sub>2</sub> production rate (panel *C*) after ingestion of CAS, WP-iL and WP-iN by young or elderly subjects (upper and lower graphs, respectively). Results are means±S.E.M. MPE: mol percent Excess. FFM: Fat Free Mass (kg).

**Fig. 7.** Evolution of plasma ketoisocaproate (KIC) enrichment (panels *A* and *B*) after ingestion of CAS, WP-iL and WP-iN by young or elderly subjects (upper and lower graphs, respectively). Results are means±S.E.M. MPE: mol percent Excess.

**Fig. 8.** Fluxes calculated using KIC enrichments. Exogenous leucine rate of appearance (Exo Leu Ra, panel *A*) endogenous leucine rate of appearance, i.e. proteolysis (Endo Leu Ra, panel *B*) and NOLD, i.e. protein synthesis (panel *C*) after ingestion of CAS, WP-iL and WP-iN by young or elderly subjects (upper and lower graphs, respectively). Results are means±S.E.M. FFM: Fat Free Mass (kg).

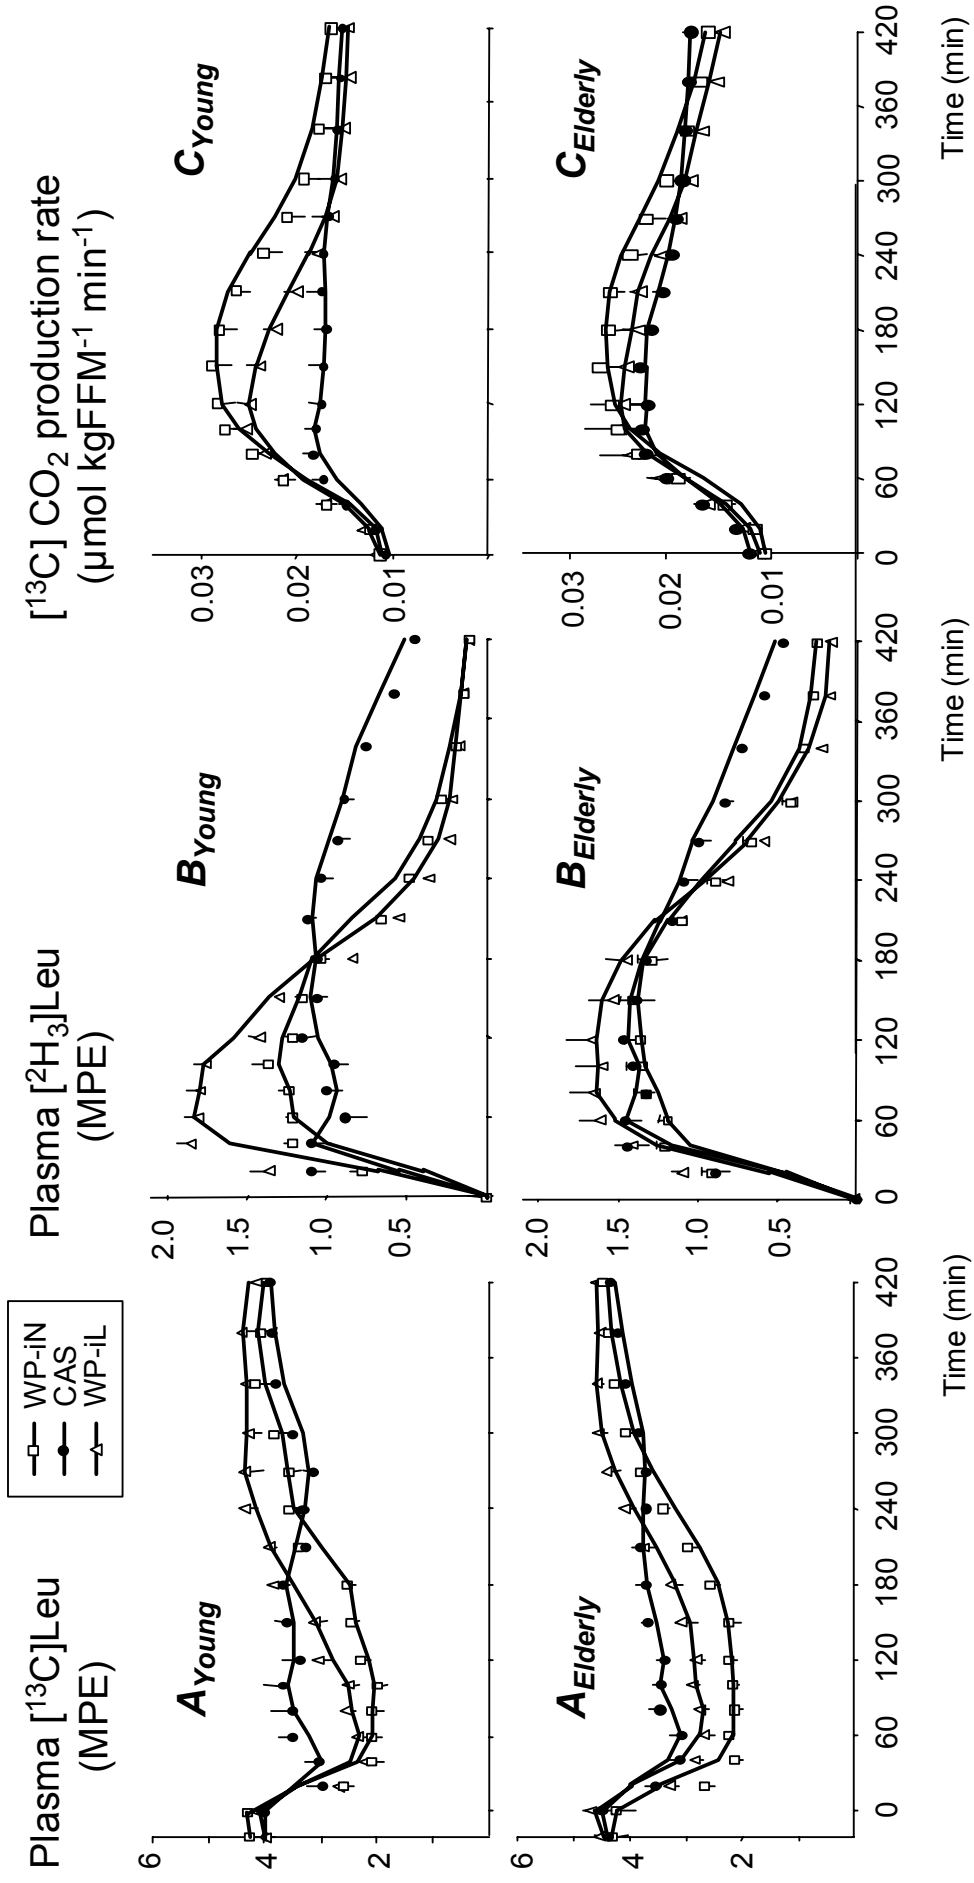

Fig. 6

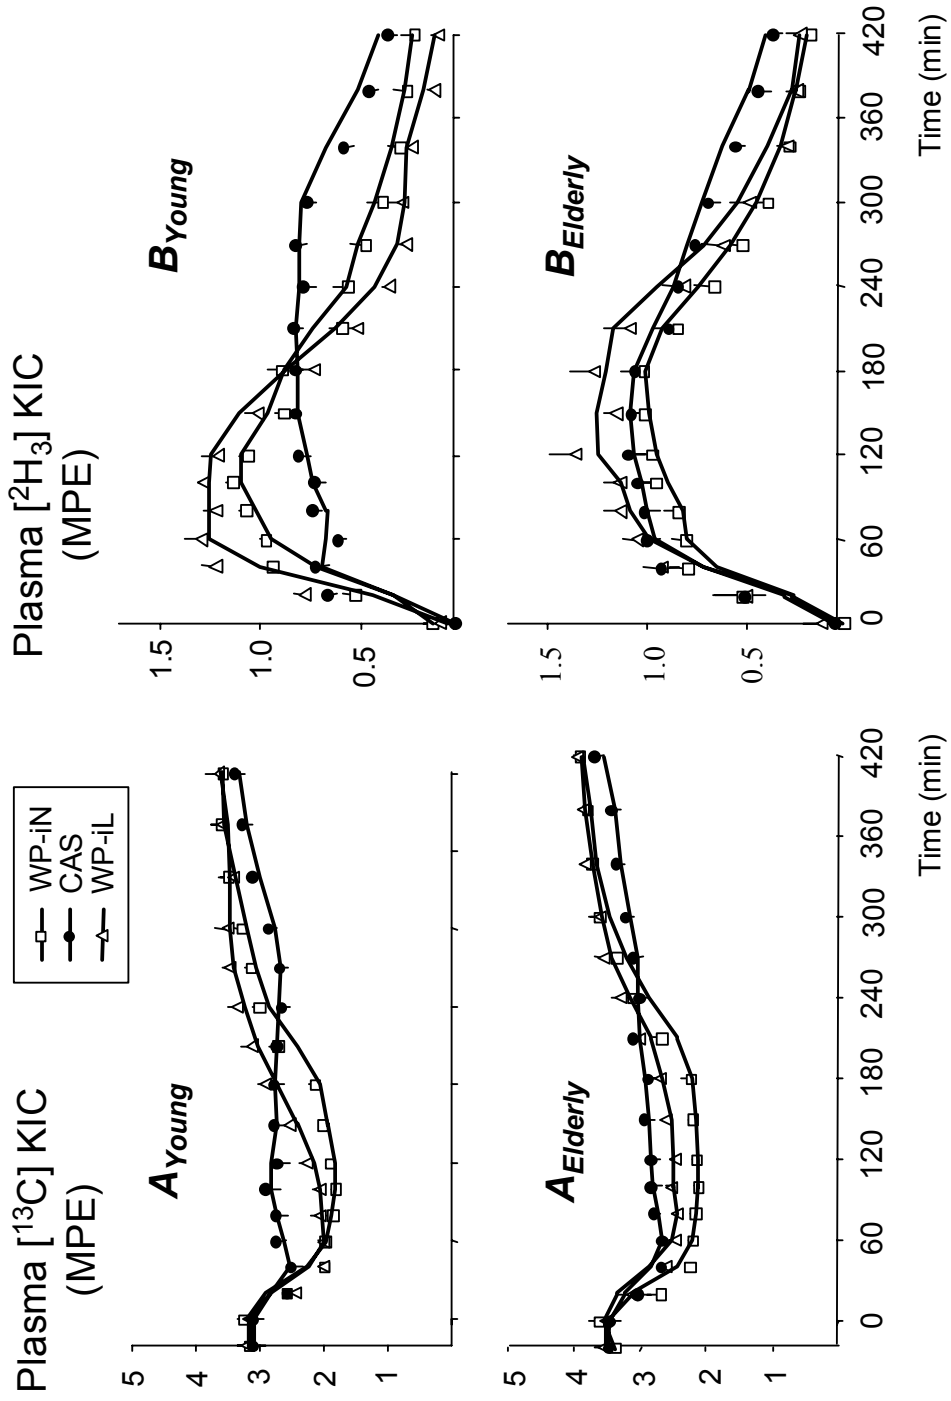

Fig. 7

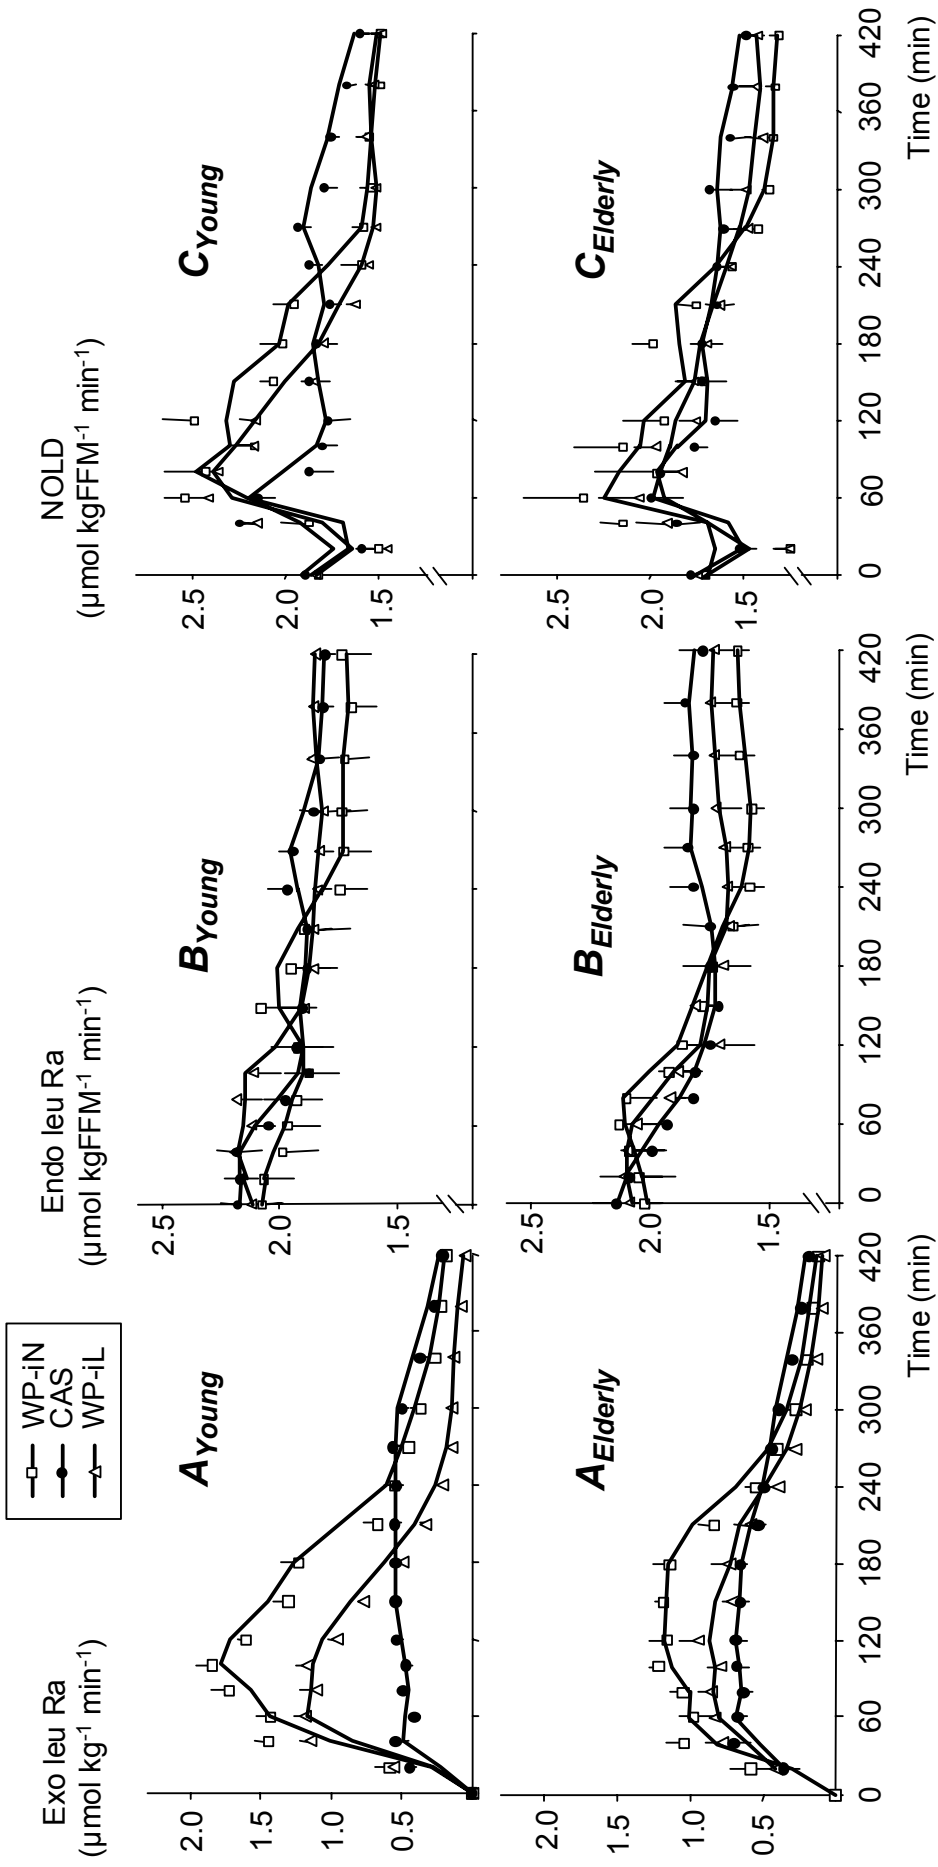

Fig. 8
